# Supplementary material for: Identification of Potential Genes Responsible for Thermotolerance in Wheat under High Temperature Stress
Source: MDPI journal article supplement (doi:10.3390/genes10020174), 2019-02-25
Supplement: s1 [file s1]

**Figure S1**

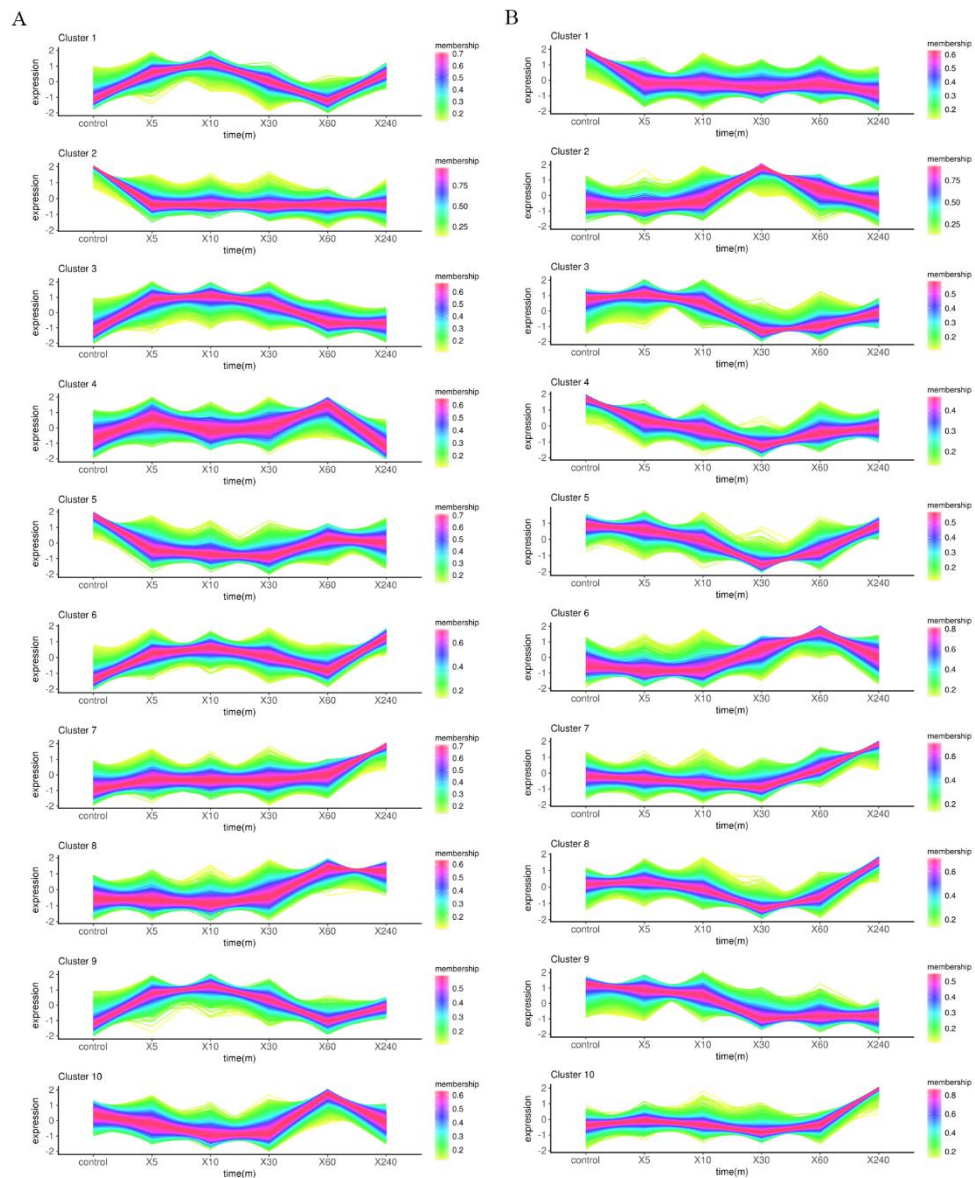

Expression pattern trends of grouping classes of DEGs over time. (A) Ten clusters grouped by differentially expressed genes from developing grain. (B) Ten clusters grouped by differentially expressed genes from flag leaf. The horizontal axes indicated the 5 time points of heat treatment, and the vertical axes indicated the expression trend of gene clusters.

**Table S1. List of primer sequence used in this study**

| Gene           | Forward primer           | Reverse primer            |
|----------------|--------------------------|---------------------------|
| <i>TaFBR1</i>  | GACTTCATCCCCATCCTCCG     | CGTTGTCCTCGTTGATCTCCC     |
| <i>TaFBR2</i>  | TGATCGACTGCATCTTAGGGTT   | TCGGGTCTTGGACACGGA        |
| <i>TaFBR3</i>  | CGAAAGATAAATCCCGACACTG   | TGATCTGCCTGCCATCAATT      |
| <i>F3-1</i>    | CGGGAAGTTCAACATCAGCG     | CCTGCTCCAAGCCACCAA        |
| <i>HSP70-1</i> | ATTTCTCCCGTGCCTCCTTG     | CGAAGCCGGTCCTTTGGTAT      |
| <i>sHSP-1</i>  | CCTCGTCGCGCTGGATTT       | ACCGCATCTTCACCTCCTTC      |
| <i>GS1</i>     | CACGGGGAAGGCATCTATTG     | ACTTGTCGTCCCATTTCGAGG     |
| <i>GS2</i>     | TGATCGACAAGGGGAGGACT     | TCTAAACTCTCAAGCCCCTGC     |
| <i>TaActin</i> | AGTGGAGGTTCTACCATGTTTCCT | CACTGTATTTTCCTTTCAGGTGGTG |

**Table S2. Top 10 key genes from wheat grain and flag leaf respectively identified by WGCNA analysis**

| Gene (Flag leaf)                       | Correlation | Gene (Grain)                           | Correlation |
|----------------------------------------|-------------|----------------------------------------|-------------|
| TRIAE_CS42_2BS_TGACv1_152915_AA0499060 | 0.984445246 | TRIAE_CS42_1AL_TGACv1_000771_AA0018790 | 0.989149303 |
| TRIAE_CS42_3DL_TGACv1_252573_AA0890770 | 0.979265308 | TRIAE_CS42_3AL_TGACv1_194869_AA0641000 | 0.987944028 |
| TRIAE_CS42_5AL_TGACv1_374280_AA1195930 | 0.972906211 | TRIAE_CS42_3DL_TGACv1_251724_AA0884250 | 0.981640085 |
| TRIAE_CS42_3DS_TGACv1_271880_AA0910080 | 0.972262551 | TRIAE_CS42_4DL_TGACv1_346552_AA1155850 | 0.980469815 |
| TRIAE_CS42_5AS_TGACv1_393222_AA1270040 | 0.971243151 | TRIAE_CS42_1BL_TGACv1_033860_AA0142380 | 0.980002224 |
| TRIAE_CS42_7BL_TGACv1_579404_AA1907000 | 0.969379356 | TRIAE_CS42_2AL_TGACv1_093753_AA0286070 | 0.979839942 |
| TRIAE_CS42_3DL_TGACv1_249244_AA0842940 | 0.965803625 | TRIAE_CS42_7DL_TGACv1_602597_AA1962040 | 0.978970112 |
| TRIAE_CS42_5AS_TGACv1_392698_AA1263180 | 0.965573848 | TRIAE_CS42_U_TGACv1_644701_AA2141240   | 0.978005102 |
| TRIAE_CS42_2BS_TGACv1_149714_AA0497520 | 0.965331988 | TRIAE_CS42_4DL_TGACv1_342934_AA1125640 | 0.975640157 |
| TRIAE_CS42_5AL_TGACv1_374527_AA1202410 | 0.964876512 | TRIAE_CS42_6DL_TGACv1_526957_AA1696050 | 0.971661782 |

**Table S3. Plant materials and treatment of our experiment and RNA-seq samples**

| Samples selected | Treatment temperature | Treatment time                 | Growth stage        | Sampling time (stage)  | Cultivar                                       | Replicas |
|------------------|-----------------------|--------------------------------|---------------------|------------------------|------------------------------------------------|----------|
| Grain            | 24°C                  | 0                              | Grain filling stage | 15 days after anthesis | <i>Triticum aestivum</i> L. cv. Chinese Spring | 3        |
| Leaf             | 24°C                  | 0                              | Grain filling stage | 15 days after anthesis | <i>Triticum aestivum</i> L. cv. Chinese Spring | 3        |
| Grain            | 37°C                  | 5 min, 10 min, 30 min, 1 h, 4h | Grain filling stage | 15 days after anthesis | <i>Triticum aestivum</i> L. cv. Chinese Spring | 3        |
| Leaf             | 37°C                  | 5 min, 10 min, 30 min, 1 h, 4h | Grain filling stage | 15 days after anthesis | <i>Triticum aestivum</i> L. cv. Chinese Spring | 3        |
